# Supplementary material for: The assessment of psychometric properties for the subjective wellbeing-5 dimensions (SWB-5D) questionnaire in the general Dutch population
Source: Springer Nature journal article supplement (doi:10.1007/s11136-022-03234-8), 2022-08-20
Supplement: MOESM1 [file 23386002]

*The assessment of psychometric properties for the Subjective Wellbeing-5 Dimensions (SWB-5D) questionnaire in a general Dutch population. Quality of Life Research. H.N Haspels, M. de Vries, M.E. van den Akker-van Marle. Department of Biomedical Data Science, section Medical Decision Making Leiden University Medical Center, Leiden, The Netherlands. Email: vandenakker@lumc.nl.*

Online Resource 1: SWB-5D questionnaire

|                                                                     | Completely disagree | Disagree | Neither agree nor disagree | Agree | Totally agree |
|---------------------------------------------------------------------|---------------------|----------|----------------------------|-------|---------------|
| My health state restricts my physical activities                    | o                   | o        | o                          | o     | o             |
| During the past week, I felt happy                                  | o                   | o        | o                          | o     | o             |
| During the past week, I felt lonely                                 | o                   | o        | o                          | o     | o             |
| I live my life my own way                                           | o                   | o        | o                          | o     | o             |
| For me, life is a continuous process of learning, change and growth | o                   | o        | o                          | o     | o             |
