# Supplementary material for: The assessment of psychometric properties for the subjective wellbeing-5 dimensions (SWB-5D) questionnaire in the general Dutch population
Source: Springer Nature journal article supplement (doi:10.1007/s11136-022-03234-8), 2022-08-20
Supplement: MOESM2 [file 23386002]

*The assessment of psychometric properties for the Subjective Wellbeing-5 Dimensions (SWB-5D) questionnaire in a general Dutch population. Quality of Life Research.*  
H.N Haspels, M. de Vries, M.E. van den Akker-van Marle. Department of Biomedical Data Science, section Medical Decision Making Leiden University Medical Center, Leiden, The Netherlands. Email: vandenakker@lumc.nl.

Online Resource 2: Overview overall psychometric testing, hypotheses construct validity and visualization on overlapping concepts tested.

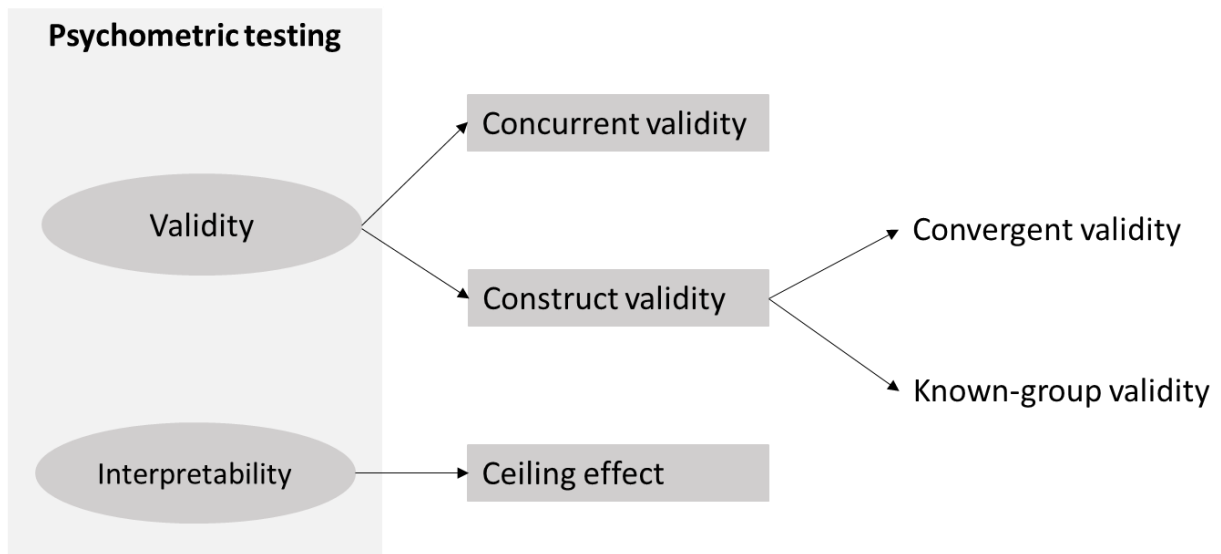

### ***Convergent validity hypotheses***

For all hypotheses we expected a significant moderate to high correlation ( $>0.35$ ).

- H1: SWB-5D sum score and the EQ-5D utility score
- H2: SWB-5D physical independence subscale and the EQ-5D mobility subscale
- H3: SWB-5D physical independence subscale and the EQ-5D self-care subscale
- H4: SWB-5D physical independence subscale and the EQ-5D usual activity subscale
- H5: SWB-5D physical independence subscale and the EQ-5D pain/discomfort subscale
- H6: SWB-5D loneliness subscale and the EQ-5D anxiety subscale
- H7: SWB-5D happiness subscale and the EQ-5D anxiety subscale
- H8: SWB-5D sum score and the EQ-VAS
- H9: SWB-5D sum score and the ICECAP-A capability score
- H10: SWB-5D physical independence subscale and the ICECAP-A autonomy subscale
- H11: SWB-5D happiness subscale and the ICECAP-A enjoyment subscale
- H12: SWB-5D happiness subscale and the ICECAP-A attachment subscale
- H13: SWB-5D loneliness subscale and the ICECAP-A enjoyment subscale
- H14: SWB-5D loneliness subscale and the ICECAP-A attachment subscale
- H15: SWB-5D autonomy subscale and the ICECAP-A autonomy subscale
- H16: SWB-5D personal growth subscale and the ICECAP-A achievement subscale
- H17: SWB-5D sum score and Cantril Ladder score

### ***Known group hypotheses***

For all hypotheses we expected a significant differences and a difference greater than the SEM.

- H18: There will be a difference in SWB-5D scores between higher and lower EQ-5D VAS scores. Higher self-reported health will lead to higher SWB-5D scores.
- H19: There will be a difference in SWB-5D scores between higher and lower Cantril ladder scores. Higher self-reported happiness will lead to higher SWB-5D scores.
- H20: There will be a difference in SWB-5D scores between being ill or not. No illness will lead to higher SWB-5D scores.
- H21: There will be a difference in SWB-5D scores between the three education levels. Higher education will lead to higher SWB-5D scores.

|          |                              | SWB-5D                |           |            |          |                 |           |
|----------|------------------------------|-----------------------|-----------|------------|----------|-----------------|-----------|
|          |                              | Physical independence | Happiness | Loneliness | Autonomy | Personal growth | Sum score |
| EQ-5D    | Mobility                     | H2                    |           |            |          |                 |           |
|          | Self-care                    | H3                    |           |            |          |                 |           |
|          | Usual activities             | H4                    |           |            |          |                 |           |
|          | Pain/Discomfort              | H5                    |           |            |          |                 |           |
|          | Anxiety/Depression           |                       | H7        | H6         |          |                 |           |
|          | Utility (weighted sum) score |                       |           |            |          |                 | H1        |
| EQ-VAS   | Utility score                |                       |           |            |          |                 | H8        |
| ICECAP-A | Stability                    |                       |           |            |          |                 |           |
|          | Attachment                   |                       | H12       | H14        |          |                 |           |
|          | Autonomy                     | H10                   |           |            | H15      |                 |           |
|          | Achievement                  |                       |           |            |          | H16             |           |
|          | Enjoyment                    |                       | H11       | H13        |          |                 |           |

Sum score

Capability (weighted sum)  
score

H9

Cantril Ladder Score

H17
