# Supplementary material for: The assessment of psychometric properties for the subjective wellbeing-5 dimensions (SWB-5D) questionnaire in the general Dutch population
Source: Springer Nature journal article supplement (doi:10.1007/s11136-022-03234-8), 2022-08-20
Supplement: MOESM3 [file 23386002]

*The assessment of psychometric properties for the Subjective Wellbeing-5 Dimensions (SWB-5D) questionnaire in a general Dutch population. Quality of Life Research.*

*H.N Haspels, M. de Vries, M.E. van den Akker-van Marle. Department of Biomedical Data Science, section Medical Decision Making Leiden University Medical Center, Leiden, The Netherlands. Email: vandenakker@lumc.nl.*

Online Resource 3: Correlation matrix between the SWB-5D, EQ-5D and ICECAP-A

|          |                     | SWB-5D                |           |            |          |                 |
|----------|---------------------|-----------------------|-----------|------------|----------|-----------------|
|          |                     | Physical independence | Happiness | Loneliness | Autonomy | Personal growth |
| EQ-5D    | Mobility            | 0,62**                | 0,171**   | 0,089**    | 0,061    | 0,134**         |
|          | Self-care           | 0,331**               | 0,141**   | 0,086**    | 0,045    | 0,046           |
|          | Usual activities    | 0,484**               | 0,328**   | 0,244**    | 0,120**  | 0,097**         |
|          | Pain/discomfort     | 0,444**               | 0,174**   | 0,118**    | 0,003    | 0,074*          |
|          | Anxiety/ depression | 0,099**               | 0,443**   | 0,477**    | 0,202**  | 0,075*          |
|          | Stability           | 0,167**               | 0,349**   | 0,285**    | 0,231**  | 0,112**         |
|          | Attachment          | 0,110**               | 0,430**   | 0,395**    | 0,182**  | 0,179**         |
| ICECAP-A | Autonomy            | 0,220**               | 0,222**   | 0,225**    | 0,146**  | 0,092**         |
|          | Achievement         | 0,256**               | 0,383**   | 0,282**    | 0,186**  | 0,241**         |
|          | Enjoyment           | 0,182**               | 0,511**   | 0,396**    | 0,243**  | 0,220**         |

*Abbreviations:* SWB-5D; Subjective wellbeing 5 dimensions, EQ-5D; EuroQol five-dimensional questionnaire, ICECAP-A; ICEpop CAPability Adult

\*\* Correlation is significant at the 0.01 level (2-tailed).

\* Correlation is significant at the 0.05 level (2-tailed).
