# Supplementary material for: The assessment of psychometric properties for the subjective wellbeing-5 dimensions (SWB-5D) questionnaire in the general Dutch population
Source: Springer Nature journal article supplement (doi:10.1007/s11136-022-03234-8), 2022-08-20
Supplement: MOESM4 [file 23386002]

*The assessment of psychometric properties for the Subjective Wellbeing-5 Dimensions (SWB-5D) questionnaire in a general Dutch population. Quality of Life Research.*  
*H.N Haspels, M. de Vries, M.E. van den Akker-van Marle. Department of Biomedical Data Science, section Medical Decision Making Leiden University Medical Center, Leiden, The Netherlands. Email: vandenakker@lumc.nl.*

Online Resource 4: Correlation matrix between the SWB-5D, EQ-5D, ICECAP-A, Cantril Ladder and EQ-VAS.

|                | SWB-5D  | EQ-5D   | ICECAP-A |
|----------------|---------|---------|----------|
| Cantril Ladder | 0.567** | 0.491** | 0.521**  |
| EQ-VAS         | 0.529** | 0.529** | 0.445**  |

*Abbreviations:* SWB-5D; Subjective wellbeing 5 dimensions, EQ-5D; EuroQol five-dimensional questionnaire, VAS; Visual Analogue Scale, ICECAP-A; ICEpop CAPability Adult

\*\* Correlation is significant at the 0.01 level (2-tailed).
